# Supplementary material
Source: PubMed Central journal article supplement (PMC6070766)
Supplement: AEM.00159-18_zam016188673s1.pdf [file AEM.00159-18_zam016188673s1.pdf]

Table S1: Number of proteins identified in each major category of protein found in extracts of degraded wood from *Postia placenta*, *Gloeophyllum trabeum*, *Trametes versicolor*, and *Stereum hirsutum*. This data was used to construct Figure 1.

| Brown rot<br>Category | <i>Postia placenta</i><br>Number of Proteins <sup>1</sup> |       |       | <i>Gloeophyllum trabeum</i><br>Number of Proteins <sup>1</sup> |       |       |
|-----------------------|-----------------------------------------------------------|-------|-------|----------------------------------------------------------------|-------|-------|
|                       | 0-5                                                       | 15-20 | 30-35 | 0-5                                                            | 15-20 | 30-35 |
| Hypothetical Proteins | 14                                                        | 18    | 10    | 78                                                             | 28    | 34    |
| Glycoside Hydrolase   | 10                                                        | 15    | 13    | 24                                                             | 20    | 16    |
| Oxidoreductase        | 2                                                         | 3     | 2     | 15                                                             | 3     | 3     |
| Esterase/Lipase       | 2                                                         | 4     | 2     | 12                                                             | 12    | 9     |
| Peptidase             | 4                                                         | 9     | 7     | 15                                                             | 12    | 9     |
| Other                 | 6                                                         | 5     | 5     | 23                                                             | 8     | 10    |
| Total                 | 38                                                        | 54    | 39    | 167                                                            | 83    | 81    |
| White rot<br>Category | <i>Trametes versicolor</i><br>Number of Proteins          |       |       | <i>Stereum hirsutum</i><br>Number of Proteins                  |       |       |
|                       | 0-5                                                       | 15-20 | 30-35 | 0-5                                                            | 15-20 | 30-35 |
| Hypothetical Proteins | 42                                                        | 20    | 24    | 2                                                              | 9     | 8     |
| Glycoside Hydrolase   | 18                                                        | 32    | 33    | 0                                                              | 6     | 17    |
| Oxidoreductase        | 22                                                        | 26    | 29    | 5                                                              | 8     | 5     |
| Esterase/Lipase       | 0                                                         | 8     | 11    | 0                                                              | 1     | 4     |
| Peptidase             | 17                                                        | 19    | 19    | 5                                                              | 12    | 13    |
| Other                 | 16                                                        | 9     | 9     | 1                                                              | 2     | 2     |
| Total                 | 115                                                       | 114   | 125   | 13                                                             | 38    | 49    |

<sup>1</sup>Number of proteins found in wafer sections 0-5, 15-20, and 30-35 mm from the hyphal front. Number of proteins were quantified from all technical replicates of protein samples from each section type.

Table S2: Carbohydrate esterase (CE) and glycoside hydrolase (GH) families identified in aspen wafer sections degraded by *Postia placenta* taken from 0-5, 15-20, 30-35 mm from the advancing hyphal front.

| Protein ID <sup>1</sup> | Allele | CE/GH <sup>2</sup> | Putative Function <sup>3</sup>  | Signal P <sup>4</sup> | Observations <sup>5</sup> |       |       |
|-------------------------|--------|--------------------|---------------------------------|-----------------------|---------------------------|-------|-------|
|                         |        |                    |                                 |                       | 0-5                       | 15-20 | 30-35 |
| 20448                   | 50078  | CE 10              | Lipase                          | no                    | 6                         | 7     | 0     |
| 106710                  |        | CE 16              | No strong hits                  | no                    | 0                         | 2     | 0     |
| 108959                  |        | CE 16              | Carboxylesterase                | 21-22                 | 0                         | 2     | 0     |
| 125801                  |        | CE 16              | Carboxylesterase                | 20-21                 | 14                        | 17    | 12    |
| 107557                  |        | GH 3               | $\beta$ -glucosidase            | no                    | 69                        | 124   | 132   |
| 103675                  | 117690 | GH 5               | Endoglucanase                   | 22-23                 | 13                        | 16    | 29    |
| 95568                   |        | GH 5               | Endo- $\beta$ -1,4-mannosidase  | 20-21                 | 0                         | 5     | 0     |
| 121831                  | 134772 | GH 5               | Endo- $\beta$ -1,4-mannanase    | no                    | 16                        | 24    | 32    |
| 115648                  | 108962 | GH 5               | Endoglucanase                   | 22-23                 | 16                        | 53    | 49    |
| 113670                  |        | GH 10              | Endo- $\beta$ -1,4-xylanase     | 18-19                 | 3                         | 1     | 0     |
| 112658                  | 121191 | GH 12              | Endo- $\beta$ -1,4-glucanase    | 18-19                 | 0                         | 0     | 2     |
| 112941                  | 61809  | GH 16              | Endo- $\beta$ -1,3(4)-glucanase | 25-26                 | 0                         | 8     | 5     |
| 116903                  | 128334 | GH 16              | Endo- $\beta$ -1,3(4)-glucanase | 17-18                 | 1                         | 9     | 0     |
| 128150                  | 98662  | GH 27              | $\alpha$ -galactosidase         | 23-24                 | 9                         | 67    | 53    |
| 111730                  | 43189  | GH 28              | Pectinase                       | 18-19                 | 13                        | 0     | 0     |
| 115593                  | 46679  | GH 47              | $\alpha$ -1,2-mannosidase       | 24-25                 | 0                         | 4     | 2     |
| 100251                  |        | GH 51              | $\alpha$ -arabinofuranosidase   | no                    | 2                         | 1     | 14    |
| 108648                  |        | GH 55              | Exo- $\beta$ -1,3-glucanase     | 17-18                 | 1                         | 6     | 3     |
| 119394                  |        | GH 55              | Exo- $\beta$ -1,3-glucanase     | 21-22                 | 0                         | 5     | 5     |
| 105490                  |        | GH 55              | Endo- $\beta$ -1,3-glucanase    | 21-22                 | 0                         | 7     | 6     |
| 111332                  |        | GH 79              | $\beta$ -glucuronidase          | no                    | 0                         | 5     | 18    |

<sup>1</sup>Protein ID numbers from the DOE JGI MycoCosm database (1).

<sup>2</sup>Carbohydrate esterase and glycoside hydrolase families as defined in the CAZy database (2).

<sup>3</sup>Putative functions determined by BLAST searches of SWISS PROT database (3).

<sup>4</sup>Secretion signals for detected protein sequences were detected using Signal P algorithm (4).

<sup>5</sup>Unique peptide counts for proteins found in wafer sections 0-5, 15-20, and 30-35 mm from the hyphal front.

Number of observations were quantified from equal portions of protein from each section type.

Table S3: Carbohydrate esterase (CE) and glycoside hydrolase (GH) families identified in aspen wafer sections degraded by *Gloeophyllum trabeum* taken from 0-5, 15-20, 30-35 mm from the advancing hyphal front.

| Protein ID <sup>1</sup> | CE/GH <sup>2</sup> | Putative Function <sup>3</sup>          | Signal P <sup>4</sup> | Observations <sup>5</sup> |       |       |
|-------------------------|--------------------|-----------------------------------------|-----------------------|---------------------------|-------|-------|
|                         |                    |                                         |                       | 0-5                       | 15-20 | 30-35 |
| 117128                  | CE 1               | Acetyl xylan esterase                   | 21-22                 | 0                         | 19    | 16    |
| 46545                   | CE 15              | 4-O-methyl-glucuronyl methylesterase    | 19-20                 | 17                        | 238   | 150   |
| 48624                   | CE 16              | Carbohydrate esterase family 16         | 21-22                 | 20                        | 53    | 5     |
| 56205                   | CE 16              | Carbohydrate esterase family 16         | 19-20                 | 9                         | 19    | 0     |
| 32318                   | CE 4               | Chitin deacetylase                      | 20-21                 | 5                         | 0     | 0     |
| 112531                  | CE 8               | Pectinesterase                          | 20-21                 | 10                        | 2     | 0     |
| 115191                  | GH 2               | $\beta$ -Mannanase                      | 19-20                 | 26                        | 25    | 5     |
| 75899                   | GH 3               | $\beta$ -glucosidase                    | no                    | 9                         | 0     | 0     |
| 69843                   | GH 3               | $\beta$ -glucosidase                    | 18-19                 | 55                        | 164   | 55    |
| 122002                  | GH 3               | Exo- $\beta$ -1,4-xylosidase            | 21-22                 | 75                        | 112   | 46    |
| 114574                  | GH 5               | Endo- $\beta$ -1,4-mannanase            | 20-21                 | 2                         | 13    | 0     |
| 110405                  | GH 5               | Endo- $\beta$ -1,4-mannanase            | 22-23                 | 4                         | 21    | 0     |
| 135369                  | GH 5               | Endo- $\beta$ -1,4-mannanase            | 18-19                 | 0                         | 8     | 0     |
| 63180                   | GH 5               | Endo- $\beta$ -1,4-glucanase            | 20-21                 | 14                        | 78    | 35    |
| 140289                  | GH 10              | Endo- $\beta$ -1,4-xylanase             | 18-19                 | 0                         | 1     | 3     |
| 46499                   | GH 10              | Endo- $\beta$ -1,4-xylanase             | no                    | 81                        | 435   | 545   |
| 138821                  | GH 12              | Xyloglucan Endo- $\beta$ -1,4-glucanase | 20-21                 | 6                         | 212   | 328   |
| 52752                   | GH 16              | $\beta$ -glucan synthesis protein       | no                    | 2                         | 0     | 0     |
| 122074                  | GH 18              | Chitinase                               | 22-23                 | 0                         | 5     | 0     |
| 77583                   | GH 20              | $\beta$ -N-acetylglucosaminidase        | 22-23                 | 14                        | 0     | 0     |
| 116582                  | GH 20              | $\beta$ -N-acetylglucosaminidase        | 19-20                 | 28                        | 15    | 0     |
| 117566                  | GH 27              | $\alpha$ -galactosidase                 | 21-22                 | 14                        | 15    | 1     |
| 6650                    | GH 28              | Pectinase                               | no                    | 8                         | 0     | 0     |
| 120615                  | GH 28              | Pectinase                               | 18-19                 | 23                        | 0     | 0     |
| 110574                  | GH 28              | Pectinase                               | 17-18                 | 22                        | 20    | 2     |
| 141329                  | GH 31              | $\alpha$ -xylosidase                    | 23-24                 | 2                         | 0     | 0     |
| 111095                  | GH 35              | $\beta$ -galactosidase                  | 23-24                 | 12                        | 0     | 0     |
| 112205                  | GH 47              | $\alpha$ -1,2-mannosidase               | 22-23                 | 7                         | 0     | 0     |
| 134804                  | GH 51              | $\alpha$ -arabinofuranosidase           | 23-24                 | 0                         | 4     | 0     |
| 126879                  | GH 55              | Exo- $\beta$ -1,3-glucosidase           | 22-23                 | 29                        | 33    | 3     |
| 113553                  | GH 72-<br>CBM43    | $\beta$ -1,3-glucanosyltransferase      | 24-25                 | 1                         | 2     | 0     |
| 116837                  | GH 79              | $\beta$ -glucuronidase                  | no                    | 0                         | 6     | 2     |
| 81814                   | GH 92              | Glycosidase                             | 19-20                 | 8                         | 0     | 0     |
| 121307                  | GH 115             | No strong hits                          | 21-22                 | 4                         | 1     | 2     |
| 121308                  | GH 115             | No strong hits                          | 21-22                 | 55                        | 108   | 42    |

<sup>1</sup>Protein ID numbers from the DOE JGI Mycosm database (1).

<sup>2</sup>Carbohydrate esterase and glycoside hydrolase families as defined in the CAZy database (2).

<sup>3</sup>Putative functions determined by BLAST searches of SWISS PROT database (3).

<sup>4</sup>Secretion signals for detected protein sequences were detected using Signal P algorithm (4).

<sup>5</sup>Unique peptide counts for proteins found in wafer sections 0-5, 15-20, and 30-35 mm from the hyphal front. Number of observations were quantified from equal portions of protein from each section type

Table S4: Carbohydrate esterase (CE) and glycoside hydrolase (GH) families identified in aspen wafer sections degraded by *Trametes versicolor* taken from 0-5, 15-20, 30-35 mm from the advancing hyphal front.

| Protein ID <sup>1</sup> | CE/GH <sup>2</sup> | Putative Function <sup>3</sup>          | Signal P <sup>4</sup> | Observations <sup>5</sup> |       |       |
|-------------------------|--------------------|-----------------------------------------|-----------------------|---------------------------|-------|-------|
|                         |                    |                                         |                       | 0-5                       | 15-20 | 30-35 |
| 112899                  | CE 15              | Glucuronyl esterase                     | no                    | 0                         | 2     | 10    |
| 70662                   | CE 16              | Carbohydrate esterase family 16         | 18-19                 | 0                         | 0     | 1     |
| 168624                  | CE 16              | Acetyl esterase                         | 21-22                 | 0                         | 8     | 4     |
| 39742                   | CE 16-CBM 1        | Carbohydrate esterase family 16         | 22-23                 | 0                         | 7     | 6     |
| 61724                   | GH 2               | $\beta$ -mannosidase                    | 18-19                 | 0                         | 0     | 2     |
| 132011                  | GH 3               | Exo- $\beta$ -1,4-xylosidase            | 24-25                 | 10                        | 7     | 6     |
| 67879                   | GH 3               | Exo- $\beta$ -1,4-xylosidase            | 24-25                 | 14                        | 11    | 3     |
| 127171                  | GH 3               | $\beta$ -glucosidase                    | no                    | 0                         | 3     | 1     |
| 68557                   | GH 3-CBM 1         | $\beta$ -glucosidase                    | 19-20                 | 0                         | 1     | 2     |
| 33056                   | GH 5-CBM 1         | Endo- $\beta$ -1,4-glucanase            | no                    | 0                         | 5     | 14    |
| 151848                  | GH 5_5-CBM 1       | Endoglucanase                           | 21-22                 | 0                         | 3     | 0     |
| 150608                  | GH 5-CBM 1         | Endoglucanase                           | 20-21                 | 0                         | 1     | 2     |
| 63826                   | GH 6               | Cellobiohydrolase                       | 20-21                 | 10                        | 306   | 334   |
| 110790                  | GH 7               | Cellobiohydrolase                       | 18-19                 | 0                         | 1     | 0     |
| 124366                  | GH 7               | Cellobiohydrolase                       | 18-19                 | 0                         | 8     | 4     |
| 112163                  | GH 7               | Cellobiohydrolase                       | 18-19                 | 4                         | 103   | 225   |
| 125941                  | GH 7, Tvf7         | Cellobiohydrolase                       | 18-19                 | 2                         | 128   | 80    |
| 33948                   | GH 10              | Endo- $\beta$ -1,4-xylanase             | 18-19                 | 0                         | 21    | 0     |
| 38102                   | GH 10-CBM 1        | Endo- $\beta$ -1,4-xylanase             | 19-20                 | 0                         | 6     | 8     |
| 50178                   | GH 12              | Xyloglucan endo- $\beta$ -1,4-glucanase | 19-20                 | 8                         | 0     | 0     |
| 136117                  | GH 12              | Endo- $\beta$ -1,4-glucanase            | 18-19                 | 0                         | 22    | 23    |
| 18215                   | GH 18              | Chitinase                               | no                    | 0                         | 3     | 0     |
| 175547                  | GH 20              | $\beta$ -hexosaminidase                 | 19-20                 | 3                         | 2     | 2     |
| 135976                  | GH 20              | $\beta$ -hexosaminidase                 | 18-19                 | 20                        | 16    | 4     |
| 60477                   | GH 27              | $\alpha$ -galactosidase                 | 19-20                 | 0                         | 1     | 0     |
| 171861                  | GH 28              | Pectinase                               | 19-20                 | 89                        | 0     | 0     |
| 62650                   | GH 28              | Rhamnogalacturonase                     | 18-19                 | 0                         | 1     | 0     |
| 52416                   | GH 28              | Pectinase                               | 19-20                 | 45                        | 41    | 47    |
| 66957                   | GH 30              | No strong hits                          | 20-21                 | 0                         | 5     | 7     |
| 58033                   | GH 31              | $\alpha/\beta$ -glucosidase             | 24-25                 | 2                         | 0     | 0     |
| 37024                   | GH 35              | $\beta$ -galactosidase                  | 25-26                 | 0                         | 7     | 13    |
| 58222                   | GH 43              | Endo- $\alpha$ -1,5-L-arabinosidase     | 22-23                 | 4                         | 0     | 0     |
| 145953                  | GH 43-CBM 35       | No strong hits                          | 19-20                 | 0                         | 6     | 7     |
| 131501                  | GH 47              | $\alpha$ -1,2-mannosidase               | 24-25                 | 7                         | 2     | 4     |

|        |                 |                                 |       |    |    |    |
|--------|-----------------|---------------------------------|-------|----|----|----|
| 59914  | GH 51           | $\alpha$ -L-arabinofuranosidase | 16-17 | 14 | 11 | 3  |
| 143650 | GH 53           | Endo- $\beta$ -1,4-galactanase  | 17-18 | 0  | 0  | 0  |
| 26555  | GH 79           | $\beta$ -glucuronidase          | 19-20 | 2  | 2  | 0  |
| 75494  | GH 92           | Uncharacterized glycosidase     | 23-24 | 23 | 2  | 0  |
| 43566  | GH 92           | Uncharacterized glycosidase     | 23-24 | 12 | 24 | 20 |
| 49304  | GH 115          | No strong hits                  | 27-28 | 10 | 66 | 28 |
| 175614 | GH 131          | No strong hits                  | 16-17 | 0  | 1  | 3  |
| 46975  | GH 131-CBM<br>1 | No strong hits                  | 18-19 | 0  | 2  | 4  |

<sup>1</sup>Protein ID numbers from the DOE JGI MycoCosm database (1).

<sup>2</sup>Carbohydrate esterase and glycoside hydrolase families as defined in the CAZy database (2).

<sup>3</sup>Putative functions determined by BLAST searches of SWISS PROT database (3).

<sup>4</sup>Secretion signals for detected protein sequences were detected using Signal P algorithm (4).

<sup>5</sup>Unique peptide counts for proteins found in wafer sections 0-5, 15-20, and 30-35 mm from the hyphal front. Number of observations were quantified from equal portions of protein from each section type.

Table S5: Carbohydrate esterase (CE) and glycoside hydrolase (GH) families identified in aspen wafer sections degraded by *Stereum hirsutum* taken from 0-5, 15-20, 30-35 mm from the advancing hyphal front.

| Protein ID <sup>1</sup> | CE/GH <sup>2</sup> | Putative Function <sup>3</sup>      | Signal P <sup>4</sup> | Observations <sup>5</sup> |       |       |
|-------------------------|--------------------|-------------------------------------|-----------------------|---------------------------|-------|-------|
|                         |                    |                                     |                       | 0-5                       | 15-20 | 30-35 |
| 127673                  | CE 1, CBM 1        | Acetyl xylan esterase               | 21-22                 | 0                         | 0     | 4     |
| 172051                  | CE 12              | Rhamnogalacturonan acetyl esterase  | 21-22                 | 0                         | 0     | 3     |
| 96554                   | CE 15, CBM 1       | Glucuronyl esterase                 | 20-21                 | 0                         | 0     | 12    |
| 144289                  | GH 3               | $\beta$ -glucosidase                | 25-26                 | 0                         | 0     | 2     |
| 65746                   | GH 5               | Endoglucanase                       | 17-18                 | 0                         | 2     | 8     |
| 136401                  | GH 5, CBM 1        | Acetate buturate ligase             | 19-20                 | 0                         | 0     | 6     |
| 165557                  | GH 5, CBM 1        | Endoglucanase                       | 20-21                 | 0                         | 0     | 2     |
| 92249                   | GH 6, CBM 1        | Cellobiohydrolase                   | 19-20                 | 0                         | 6     | 187   |
| 62237                   | GH 7               | Cellobiohydrolase                   | 19-20                 | 0                         | 0     | 103   |
| 49403                   | GH 10, CBM 1       | Endo- $\beta$ -1,4-xylanase         | 20-21                 | 0                         | 0     | 5     |
| 91607                   | GH 10, CBM 1       | Endo- $\beta$ -1,4-xylanase         | 20-21                 | 0                         | 0     | 6     |
| 123978                  | GH 15, CBM 20      | Glucoamylase                        | 23-24                 | 0                         | 0     | 2     |
| 58599                   | GH 15, CBM 20      | Glucoamylase                        | 17-18                 | 0                         | 0     | 8     |
| 49482                   | GH 18, CBM 5       | No strong hits                      | 24-25                 | 0                         | 0     | 2     |
| 61806                   | GH 18, CBM 5       | No strong hits                      | no                    | 0                         | 0     | 3     |
| 91437                   | GH 18, CBM 5       | Chitinase                           | 25-26                 | 0                         | 0     | 2     |
| 150302                  | GH 28              | Exopolysaccharidase                 | 18-19                 | 0                         | 1     | 2     |
| 130790                  | GH 28              | Polygalacturonase                   | 19-20                 | 0                         | 0     | 67    |
| 82112                   | GH 72 CBM 43       | $\beta$ -1,3-glucanosyl transferase | 20-21                 | 0                         | 1     | 6     |
| 112437                  | GH 75              | Endo-chitosanase                    | 23-24                 | 0                         | 2     | 0     |
| 128057                  | GH 79              | $\beta$ -glucuronidase              | 22-23                 | 0                         | 2     | 2     |

<sup>1</sup>Protein ID numbers from the DOE JGI Mycosm database (1).

<sup>2</sup>Carbohydrate esterase and glycoside hydrolase families as defined in the CAZy database (2).

<sup>3</sup>Putative functions determined by BLAST searches of SWISS PROT database (3).

<sup>4</sup>Secretion signals for detected protein sequences were detected using Signal P algorithm (4).

<sup>5</sup>Unique peptide counts for proteins found in wafer sections 0-5, 15-20, and 30-35 mm from the hyphal front. Number of observations were quantified from equal portions of protein from each section type.

Table S6: Putative oxidoreductases identified in aspen wafer sections degraded by *Postia placenta* taken from 0-5, 15-20, 30-35 mm from the advancing hyphal front.

| Protein ID <sup>1</sup> | OR Description | Putative Function <sup>2</sup> | Signal P <sup>3</sup> | Observations <sup>4</sup> |       |       |
|-------------------------|----------------|--------------------------------|-----------------------|---------------------------|-------|-------|
|                         |                |                                |                       | 0-5                       | 15-20 | 30-35 |
| 127365                  | Oxidoreductase | Cytochrome b oxidoreductase    | no                    | 15                        | 57    | 25    |
| 130375                  | Oxidoreductase | Cytochrome b oxidoreductase    | no                    | 0                         | 5     | 6     |
| 116836                  | Thioredoxin    | Thioredoxin                    | no                    | 1                         | 1     | 0     |

<sup>1</sup>Protein ID numbers from the DOE JGI MycoCosm database (1).

<sup>2</sup>Putative functions determined by BLAST searches of SWISS PROT database (3).

<sup>3</sup>Secretion signals for detected protein sequences were detected using Signal P algorithm (4).

<sup>4</sup>Unique peptide counts for proteins found in wafer sections 0-5, 15-20, and 30-35 mm from the hyphal front. Number of observations were quantified from equal portions of protein from each section type.

Table S7: Putative oxidoreductases identified in aspen wafer sections degraded by *Gloeophyllum trabeum* taken from 0-5, 15-20, 30-35 mm from the advancing hyphal front.

| Protein ID <sup>1</sup> | OR Description                        | Putative Function <sup>2</sup>      | Signal P <sup>3</sup> | Observations <sup>4</sup> |       |       |
|-------------------------|---------------------------------------|-------------------------------------|-----------------------|---------------------------|-------|-------|
|                         |                                       |                                     |                       | 0-5                       | 15-20 | 30-35 |
| 113068                  | Aldo/keto reductase                   | NAD(P)H-xylose reductase            | no                    | 9                         | 0     | 0     |
| 75987                   | Aldo/ketoreductase                    | Glycerol-2-dehydrogenase            | no                    | 7                         | 0     | 0     |
| 111441                  | Aldo/ketoreductase                    | Aldo/ketoreductase                  | no                    | 14                        | 0     | 0     |
| 135963                  | Cytochrome b5-like                    | Cytochrome b5                       | no                    | 10                        | 0     | 0     |
| 140776                  | Oxidoreductase                        | Putative oxidoreductase             | no                    | 4                         | 0     | 0     |
| 95549                   | Oxidoreductase-FAD binding            | Solanopyrone synthase               | 26-27                 | 10                        | 0     | 0     |
| 130320                  | Oxidoreductase-FAD-linked             | Uncharacterized oxidoreductase      | 28-29                 | 9                         | 0     | 0     |
| 46992                   | Oxidoreductase-glutathione peroxidase | Glutathione peroxidase              | no                    | 26                        | 0     | 0     |
| 65654                   | Oxidoreductase-glyoxal oxidase        | Glyoxal oxidase                     | 21-22                 | 2                         | 0     | 0     |
| 74773                   | Oxidoreductase-GMC                    | Choline dehydrogenase               | 19-20                 | 6                         | 0     | 0     |
| 116849                  | Oxidoreductase-nitrate reductase      | Nitrate reductase                   | no                    | 1                         | 1     | 0     |
| 65680                   | Oxidoreductase-thioredoxin            | Thioredoxin                         | no                    | 45                        | 0     | 0     |
| 82515                   | Polyamine oxidase, FAD-containing     | Flavin-containing polyamine oxidase | 20-21                 | 5                         | 7     | 0     |
| 134939                  | Thioredoxin                           | Thioredoxin                         | no                    | 838                       | 107   | 8     |
| 62178                   | Thioredoxin reductase                 | Thioredoxin reductase               | no                    | 16                        | 0     | 0     |

<sup>1</sup>Protein ID numbers from the DOE JGI MycoCosm database (1).

<sup>2</sup>Putative functions determined by BLAST searches of SWISS PROT database (3).

<sup>3</sup>Secretion signals for detected protein sequences were detected using Signal P algorithm (4).

<sup>4</sup>Unique peptide counts for proteins found in wafer sections 0-5, 15-20, and 30-35 mm from the hyphal front.

Table S8: Putative oxidoreductases identified in aspen wafer sections degraded by *Stereum hirsutum* taken from 0-5, 15-20, 30-35 mm from the advancing hyphal front.

| Protein ID <sup>1</sup> | OR Description           | Putative Function <sup>2</sup> | Signal P <sup>3</sup> | Observations <sup>4</sup> |       |       |
|-------------------------|--------------------------|--------------------------------|-----------------------|---------------------------|-------|-------|
|                         |                          |                                |                       | 0-5                       | 15-20 | 30-35 |
| 74329                   | Cellobiose dehydrogenase | Cellobiose dehydrogenase       | 19-20                 | 0                         | 0     | 3     |
| 76915                   | CRO                      | Glyoxal oxidase                | 22-23                 | 11                        | 140   | 122   |
| 129431                  | Laccase, SHlcc5          | Laccase-4                      | 22-23                 | 1                         | 3     | 0     |
| 99490                   | LPMO                     | LPMO                           | 18-19                 | 0                         | 0     | 2     |
| 121343                  | LPMO, CBM 1              | LPMO                           | 20-21                 | 0                         | 5     | 21    |
| 142136                  | MnP, atypical            | Versatile peroxidase           | 22-23                 | 3                         | 2     | 0     |
| 134504                  | MnP, atypical            | Versatile peroxidase           | 22-23                 | 4                         | 62    | 13    |
| 161701                  | MnP, atypical            | Versatile peroxidase           | 22-23                 | 0                         | 8     | 0     |
| 134527                  | MnP, atypical            | Versatile peroxidase           | 22-23                 | 0                         | 25    | 1     |
| 171838                  | MnP, atypical            | Versatile peroxidase           | 22-23                 | 28                        | 51    | 0     |

<sup>1</sup>Protein ID numbers from the DOE JGI Mycosm database (1).

<sup>2</sup>Putative functions determined by BLAST searches of SWISS PROT database (3).

<sup>3</sup>Secretion signals for detected protein sequences were detected using Signal P algorithm (4).

<sup>4</sup>Unique peptide counts for proteins found in wafer sections 0-5, 15-20, and 30-35 mm from the hyphal front. Number of observations were quantified from equal portions of protein from each section type.



Table S9: Putative oxidoreductases identified in aspen wafer sections degraded by *Trametes versicolor* taken from 0-5, 15-20, 30-35 mm from the advancing hyphal front.

| Protein ID <sup>1</sup> | OR Description                    | Putative Function <sup>2</sup> | Signal P <sup>3</sup> | Observations <sup>4</sup> |       |       |
|-------------------------|-----------------------------------|--------------------------------|-----------------------|---------------------------|-------|-------|
|                         |                                   |                                |                       | 0-5                       | 15-20 | 30-35 |
| 143158                  | Cytochrome b5                     | Cytochrome b5                  | no                    | 21                        | 0     | 0     |
| 48870                   | DyP1                              | Dye-decolorizing peroxidase    | no                    | 174                       | 57    | 33    |
| 48874                   | DyP2                              | Dye-decolorizing peroxidase    | no                    | 109                       | 4     | 7     |
| 73596                   | Iron reductase/GMC oxidoreductase | Cellobiose dehydrogenase       | 19-20                 | 0                         | 2     | 1     |
| 146232                  | Laccase, TvLac2                   | Laccase-2                      | 25-26                 | 41                        | 0     | 0     |
| 138261                  | Laccase, TvLac3                   | Laccase                        | 21-22                 | 62                        | 27    | 14    |
| 115295                  | Laccase, TvLac4                   | Laccase                        | 22-23                 | 16                        | 0     | 0     |
| 43576                   | Lignin peroxidase 1               | Lignin peroxidase              | 21-22                 | 8                         | 42    | 41    |
| 114944                  | Lignin peroxidase 12              | Ligninase C                    | 21-22                 | 0                         | 0     | 0     |
| 43578                   | Lignin peroxidase 2               | Lignin peroxidase              | 21-22                 | 6                         | 34    | 66    |
| 52333                   | Lignin peroxidase 6               | Ligninase C                    | 21-22                 | 0                         | 0     | 0     |
| 134226                  | Lignin peroxidase 9               | Ligninase C                    | 20-21                 | 12                        | 69    | 34    |
| 162601                  | LPMO                              | LPMO                           | 18-19                 | 0                         | 23    | 19    |
| 162729                  | LPMO                              | LPMO                           | 16-17                 | 0                         | 2     | 1     |
| 51004                   | LPMO                              | LPMO                           | 17-18                 | 0                         | 4     | 4     |
| 36998                   | LPMO                              | LPMO                           | 20-21                 | 0                         | 33    | 16    |
| 51375                   | Mn peroxidase 1, short            | Mn Peroxidase 3                | 21-22                 | 53                        | 1     | 1     |
| 112835                  | Mn peroxidase 2                   | Mn Peroxidase 3                | 21-22                 | 2                         | 5     | 4     |
| 131080                  | Mn peroxidase 3s                  | Mn Peroxidase 3                | 21-22                 | 11                        | 0     | 0     |
| 130496                  | Mn peroxidase 4s                  | Mn Peroxidase 3                | 21-22                 | 211                       | 38    | 30    |
| 43477                   | Mn peroxidase 5                   | Mn peroxidase                  | 21-22                 | 0                         | 3     | 0     |
| 51455                   | Mn peroxidase 6                   | Manganese peroxidase 3         | 21-22                 | 53                        | 10    | 5     |
| 51457                   | Mn peroxidase 9                   | Manganese Peroxidase 3         | no                    | 0                         | 0     | 0     |
| 174721                  | Oxidoreductase, GMC               | Pyranose 2 oxidase             | no                    | 19                        | 3     | 0     |
| 32746                   | Thioredoxin                       | Thioredoxin                    | no                    | 51                        | 1     | 21    |
| 156571                  | Thioredoxin                       | Thioredoxin                    | no                    | 5                         | 0     | 0     |
| 68124                   | Xylose reductase                  | Xylose reductase               | no                    | 28                        | 0     | 0     |

<sup>1</sup>Protein ID numbers from the DOE JGI MycoCosm database (1).

<sup>2</sup>Putative functions determined by BLAST searches of SWISS PROT database (3).

<sup>3</sup>Secretion signals for detected protein sequences were detected using Signal P algorithm (4).

<sup>4</sup>Unique peptide counts for proteins found in wafer sections 0-5, 15-20, and 30-35 mm from the hyphal front. Number of observations were quantified from equal portions of protein from each section type.

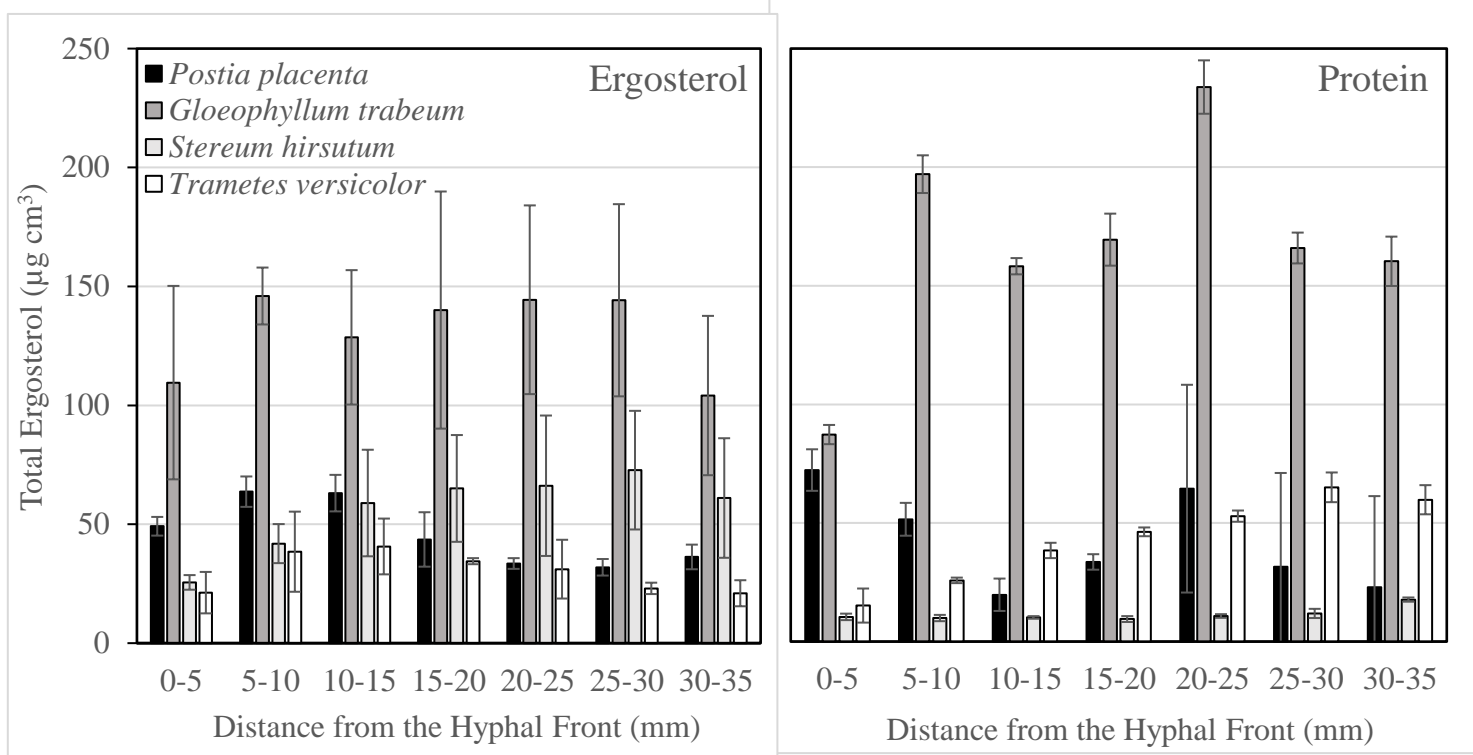

Figure S1: Total ergosterol and protein isolated from 5 mm wafer sections along an advancing hyphal front on aspen wafers. Values were standardized to the volume of wood from which it was extracted. Ergosterol error bars are +/- one standard deviation of three replicate wafer sections and protein error bars are standard deviations of three assays of a single extract of 12 wafer sections.

## References

1. **Grigoriev IV, Nikitin R, Haridas S, Kuo A, Ohm R, Otilar R, Riley R, Salamov A, Zhao XL, Korzeniewski F, Smirnova T, Nordberg H, Dubchak I, Shabalov I.** 2014. MycoCosm portal: gearing up for 1000 fungal genomes. *Nucleic Acids Research* **42**:D699-D704.
2. **Lombard V, Ramulu HG, Drula E, Coutinho PM, Henrissat B.** 2014. The carbohydrate-active enzymes database (CAZy) in 2013. *Nucleic Acids Research* **42**:D490-D495.
3. **Bateman A, Martin MJ, O'Donovan C, Magrane M, Apweiler R, Alpi E, Antunes R, Ar-Ganiska J, Bely B, Bingley M, Bonilla C, Britto R, Bursteinas B, Chavali G, Cibrian-Uhalte E, Da Silva A, De Giorgi M, Dogan T, Fazzini F, Gane P, Cas-Tro LG, Garmiri P, Hatton-Ellis E, Hieta R, Huntley R, Legge D, Liu WD, Luo J, MacDougall A, Mutowo P, Nightin-Gale A, Orchard S, Pichler K, Poggioli D, Pundir S, Pureza L, Qi GY, Rosanoff S, Saidi R, Sawford T, Shypitsyna A, Turner E, Volynkin V, Wardell T, Watkins X, Watkins, Cowley A, Figueira L, Li WZ, McWilliam H, et al.** 2015. UniProt: a hub for protein information. *Nucleic Acids Research* **43**:D204-D212.
4. **Petersen TN, Brunak S, von Heijne G, Nielsen H.** 2011. SignalP 4.0: discriminating signal peptides from transmembrane regions. *Nature Methods* **8**:785-786.
